# Supplementary material
Source: PubMed Central journal article supplement (PMC3156046)

**Table S1. *Tal1/Lmo2* tumors are functionally heterogeneous**

| <b>Disease Latency and Penetrance</b> |                 |                 |                 |                  |                  |                  |
|---------------------------------------|-----------------|-----------------|-----------------|------------------|------------------|------------------|
| <b>Dilution</b>                       | <b>8129</b>     | <b>2695</b>     | <b>1002</b>     | <b>2697</b>      | <b>2692</b>      | <b>1450</b>      |
| <b>10<sup>6</sup></b>                 | <b>4/4 (26)</b> | <b>N.D.</b>     | <b>8/8 (10)</b> | <b>N.D.</b>      | <b>N.D.</b>      | <b>N.D.</b>      |
| <b>10<sup>5</sup></b>                 | <b>3/3 (29)</b> | <b>4/4 (32)</b> | <b>8/8 (13)</b> | <b>2/2 (38)</b>  | <b>4/4 (45)</b>  | <b>3/3 (25)</b>  |
| <b>10<sup>4</sup></b>                 | <b>3/4 (41)</b> | <b>3/4 (42)</b> | <b>8/8 (18)</b> | <b>1/3 (69)</b>  | <b>2/4 (70)</b>  | <b>N.D.</b>      |
| <b>10<sup>3</sup></b>                 | <b>1/4 (53)</b> | <b>2/4 (61)</b> | <b>7/8 (26)</b> | <b>0/3 (181)</b> | <b>0/4 (175)</b> | <b>2/3 (40)</b>  |
| <b>10<sup>2</sup></b>                 | <b>N.D.</b>     | <b>N.D.</b>     | <b>2/8 (35)</b> | <b>N.D.</b>      | <b>N.D.</b>      | <b>0/3 (257)</b> |
| <b>L-IC frequency</b>                 | <b>1:30,735</b> | <b>1:4,579</b>  | <b>1:2,209</b>  | <b>1:10,725</b>  | <b>1:16,085</b>  | <b>1:4,962</b>   |
| <b>% DN3</b>                          | <b>1.04</b>     | <b>11.08</b>    | <b>29.29</b>    | <b>4.12</b>      | <b>67.61</b>     | <b>5.47</b>      |

( ) number in parentheses indicates latency in days; N.D. not determined

**Table S2. Notch1 inhibition reduces leukemia-initiating cell activity**

**Disease Latency and Penetrance**

| Dilution | 1007     |           | 1426      |           | 1928      |           | 2544      |          | 3304     |          |
|----------|----------|-----------|-----------|-----------|-----------|-----------|-----------|----------|----------|----------|
|          | Vehicle  | GSI       | Vehicle   | GSI       | Vehicle   | GSI       | Vehicle   | GSI      | Vehicle  | GSI      |
| $10^5$   | 3/3 (17) | 3/3 (20)  | 3/3 (31)  | 0/3 (181) | 4/4 (17)  | 3/4 (29)  | 4/4 (28)  | 0/4 (72) | 4/4 (22) | 4/4 (30) |
| $10^4$   | 2/3 (21) | 2/3 (29)  | 4/4 (51)  | 0/4 (181) | 3/4 (24)  | 3/4 (38)  | 3/4 (39)  | 0/4 (72) | 4/4 (25) | 1/4 (38) |
| $10^3$   | 1/3 (31) | 0/3 (145) | 0/3 (181) | 0/3 (181) | 0/3 (145) | 0/3 (145) | 1/4 (17)* | 0/4 (72) | 4/4 (31) | 0/4 (72) |

( ) number in parentheses indicates latency in days; \* Mouse died of causes unrelated to leukemia

**Figure S1. Purity of sorted *TNR/Tal1/Lmo2* preleukemic thymi and validation that GFP+ populations exhibit increased Notch1 target gene expression**

(A) Preleukemic cells from *TNR/Tal1/Lmo2* thymi were isolated and stained with lineage-specific, CD25, and CD44 antibodies. Cells were gated on lineage-negative then analyzed based on the indicated populations and for GFP expression. Population purity was examined post-sorting and is indicated above the resulting population. *c-Myc* (B) or *Deltex1* (C) expression in the indicated populations were analyzed by real time quantitative PCR. Samples were analyzed in triplicate, but performed on one sorted thymi since results are consistent with published data.<sup>1</sup>

**Figure S2. Purity of sorted tumor populations transplanted into syngeneic recipients**

Leukemic cells from *Tal1/Lmo2* mice were isolated and stained with CD4, CD8 antibodies; lineage negative cells were then stained with CD25 and CD44 antibodies. Cells were sorted based on the indicated populations and population purity was examined post-sorting. The DP population is shown in the upper two panels and the DN3 population in the lower two panels. Purity is indicated above the resulting post-sort populations.

**Figure S3. GSI administration to leukemic mice results in decreased Notch1 target gene expression**

Mice transplanted with primary mouse leukemic cells were treated with vehicle or GSI and *c-Myc* (A) or *Deltex1* (B) expression analyzed by real time quantitative PCR. *c-Myc* (C) and *Deltex1* (D) mRNA levels were also monitored at the time of disease recurrence. Copy number was normalized to  $\beta$ -actin using the  $\Delta\Delta$ CT method.

**Figure S4. Transplanted mice treated with GSI continued to gain weight throughout the treatment period**

Recipient mice transplanted with mouse T-ALLs 1928, 1426, and 1007 were treated with vehicle or 150mg/kg GSI (MRK-003) using an intermittent dosing regimen.<sup>2</sup> Vehicle mice were given an equal volume of methylcellulose by oral gavage. The animals were weighed once per week, with GSI administered immediately following transplant and at 1 and 2 weeks post-transplant.

**Figure S5. Mouse T-ALLs examined in the GSI treatment study express high levels of intracellular Notch1, harbor insertions/deletions that result in PEST truncation and express aberrant 3' transcripts**

(A) Mouse T-ALL cell lysates were examined for intracellular Notch1 protein levels by immunoblotting with Notch1 Val1744 (Cell Signaling, cat #2421S). Jurkat is a human T-ALL cell line that expresses full length ICN1; FVB is wild-type thymus; 2906 is a mouse tumor with truncated ICN1; 1007, 1426, 1928, 2544, and 3304 are the mouse *Tal1/Lmo2* T-ALLs examined in Figure 6. (B) DNA was isolated from the mouse T-ALLs and amplified with primers specific to exon 34 of the *Notch1* gene. PCR product was cloned into the TOPO TA cloning vector for sequencing using the universal M13 primers. Mutations were then analyzed using MacVector software. (C) Ratiometric *Notch1* quantitative RT-PCR analysis of mouse *Tal1/Lmo2* T-ALLs. The relative amounts of transcripts containing 5' (exons 1 and 2) and 3' (exons 30 and 31) *Notch1* sequences were determined for primary tumors (pri) and transplanted tumors (trans) as described in <sup>3</sup>. Each determination was made in triplicate.

## REFERENCES

1. Duncan AW, Rattis FM, DiMascio LN, et al. Integration of Notch and Wnt signaling in hematopoietic stem cell maintenance. *Nat Immunol.* 2005;6:314–322.
2. Cullion K, Draheim KM, Hermance N, et al. Targeting the Notch1 and mTOR pathways in a mouse T-ALL model. *Blood.* 2009;113:6172–6181.
3. Ashworth TD, Pear WS, Chiang MY, et al. Deletion-based mechanisms of Notch1 activation in T-ALL: key roles for RAG recombinase and a conserved internal translational start site in Notch1. *Blood.* 2010;116:5455–5464.

Figure S1

A

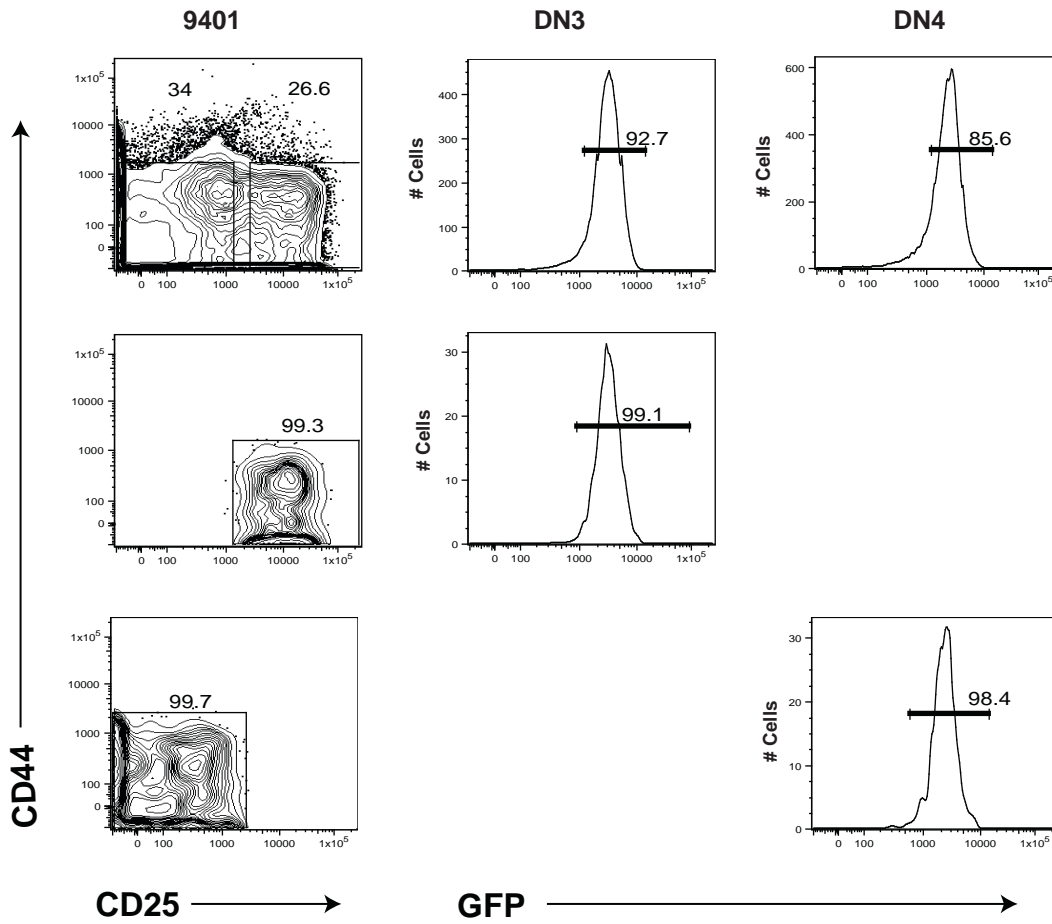

B

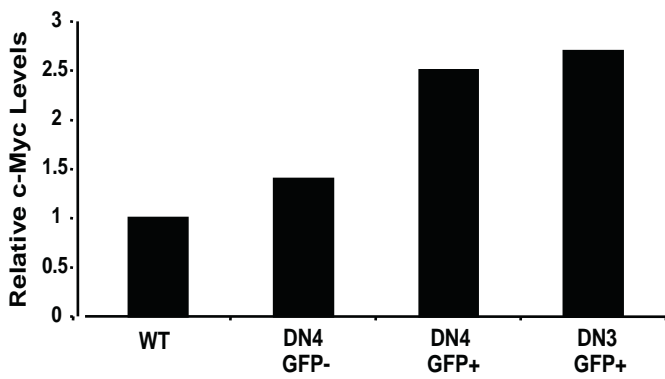

C

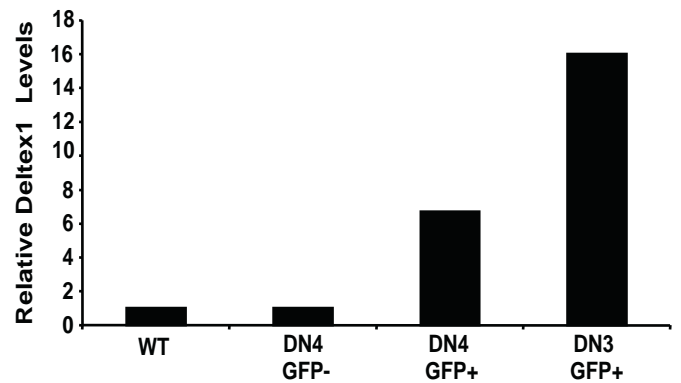

Figure S2

Experiment #1

Experiment #2

Experiment #3

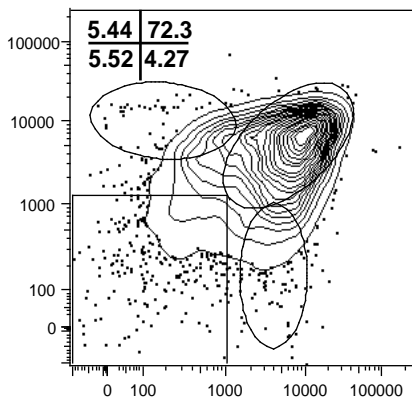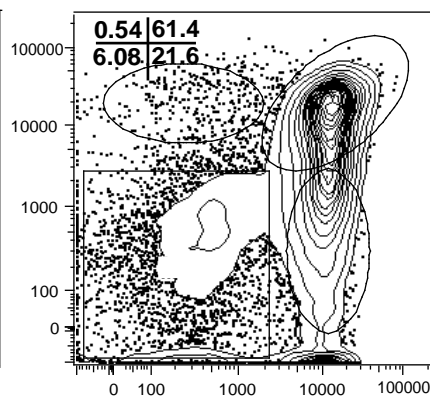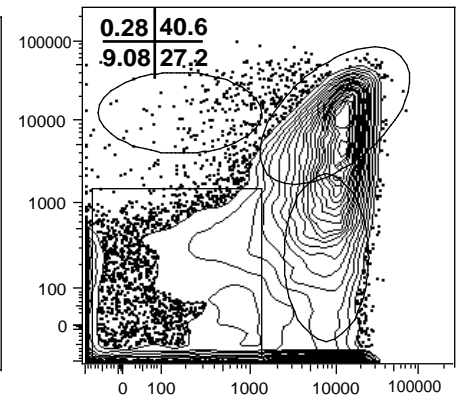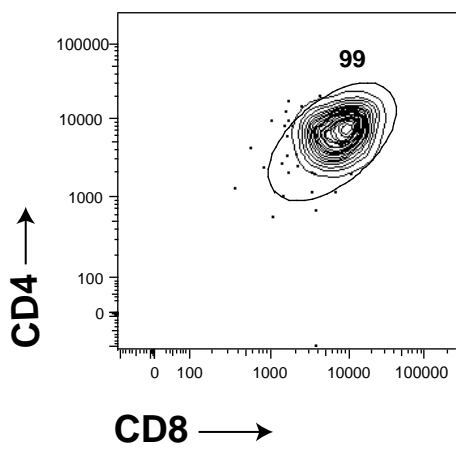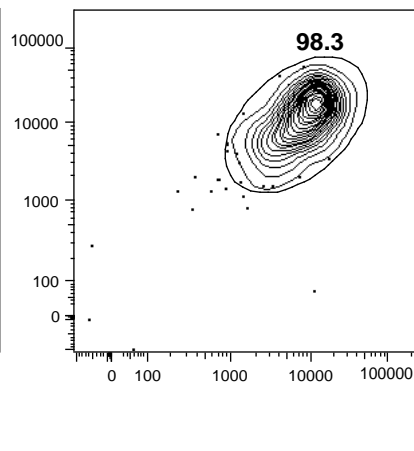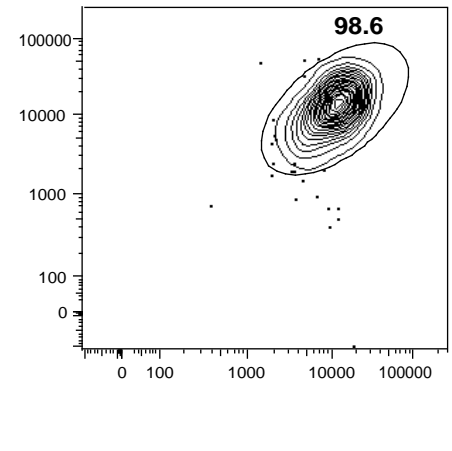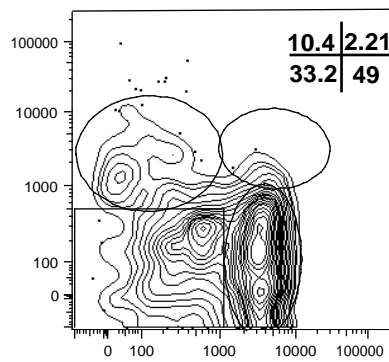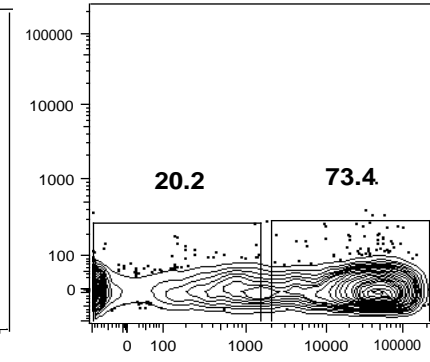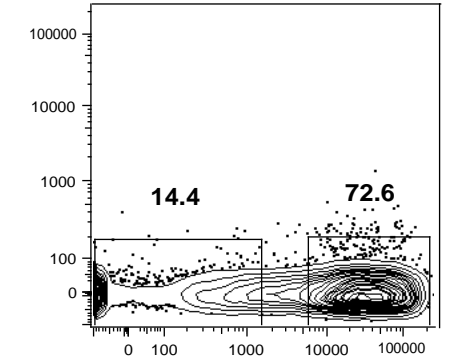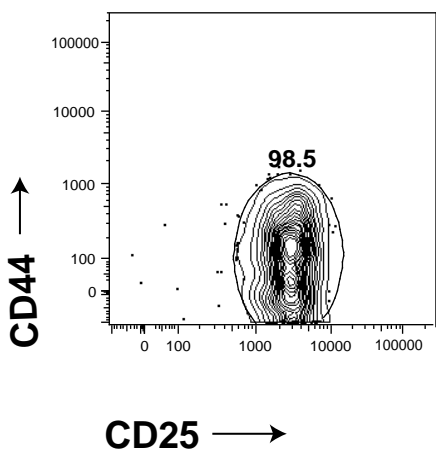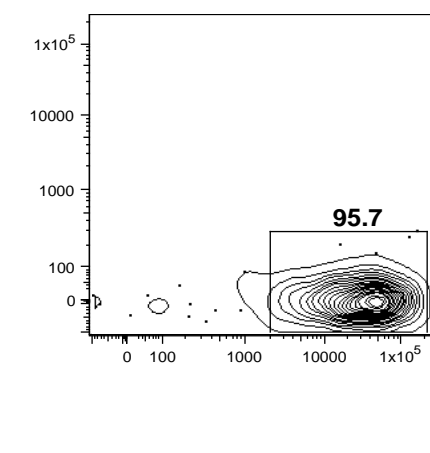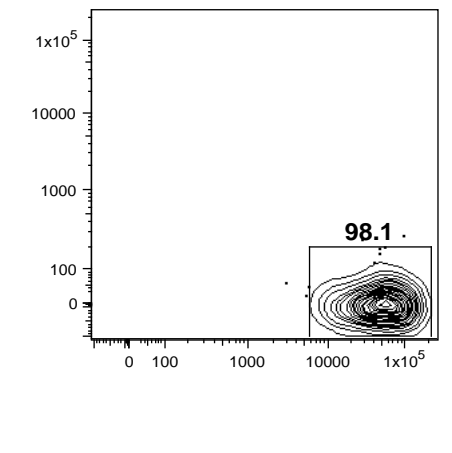

Figure S3

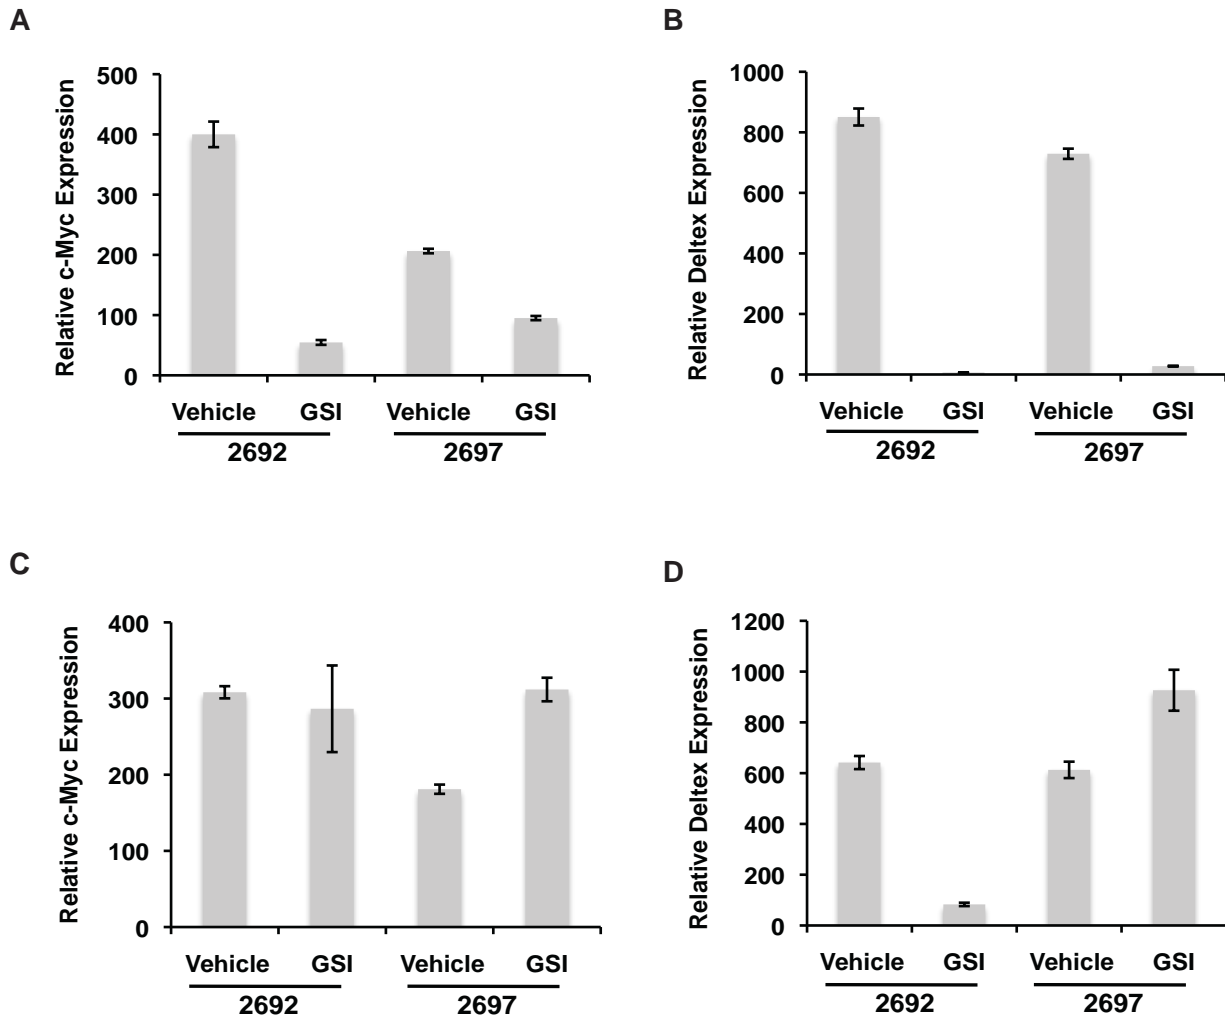

Figure S4

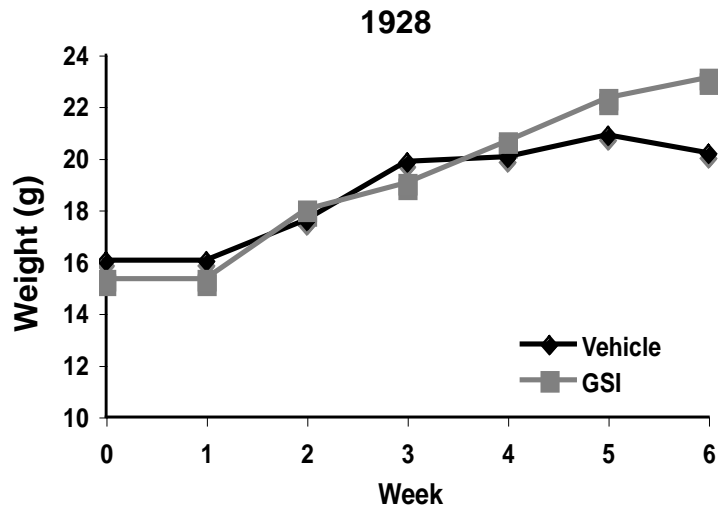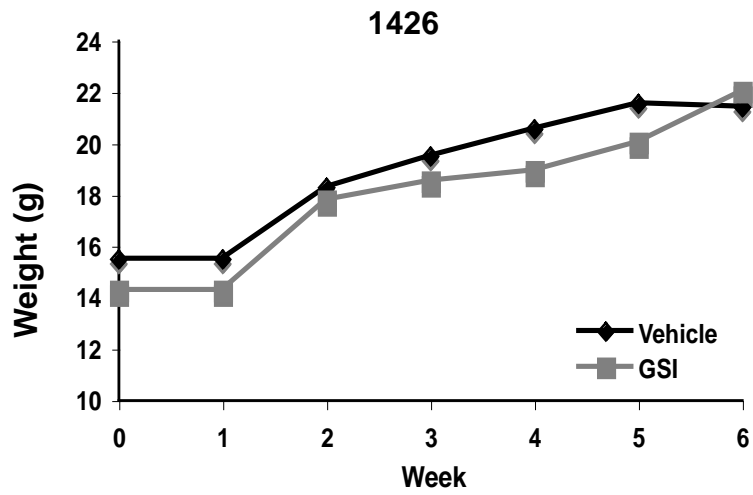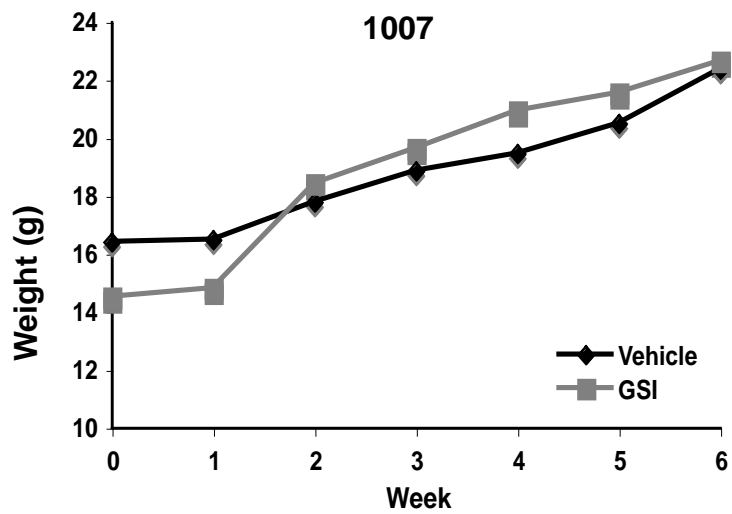



**A**

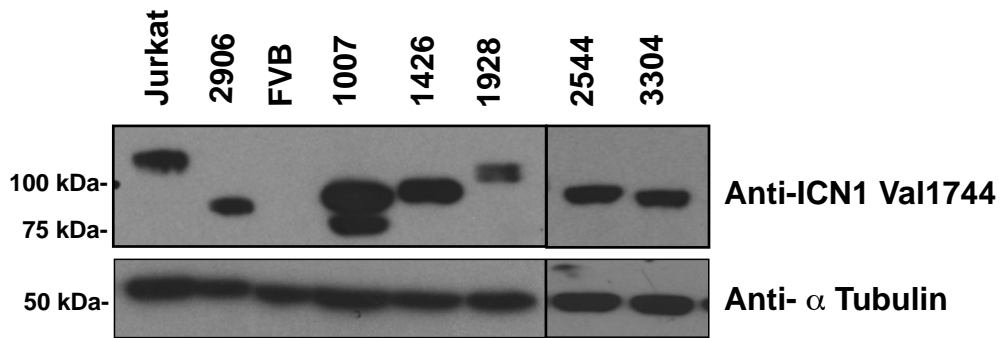

**B**

| Tumor # | Genotype         | Nucleic Acid Change      | Amino Acid Change |
|---------|------------------|--------------------------|-------------------|
| 1007    | <i>Tal1/Lmo2</i> | 7215 ins TTTT            | 2406 T->F         |
| 1426    | <i>Tal1/Lmo2</i> | 7161 C->G,<br>ins G      | 2387 T-> R        |
| 1928    | <i>Tal1/Lmo2</i> | 7131 del G               | 2377 D->I         |
| 2544    | <i>Tal1/Lmo2</i> | 7162 del G,<br>ins CCCTC | 2388 A->P         |
| 3304    | <i>Tal1/Lmo2</i> | 7273 del G,<br>ins AA    | 2425 G->K         |

**C**

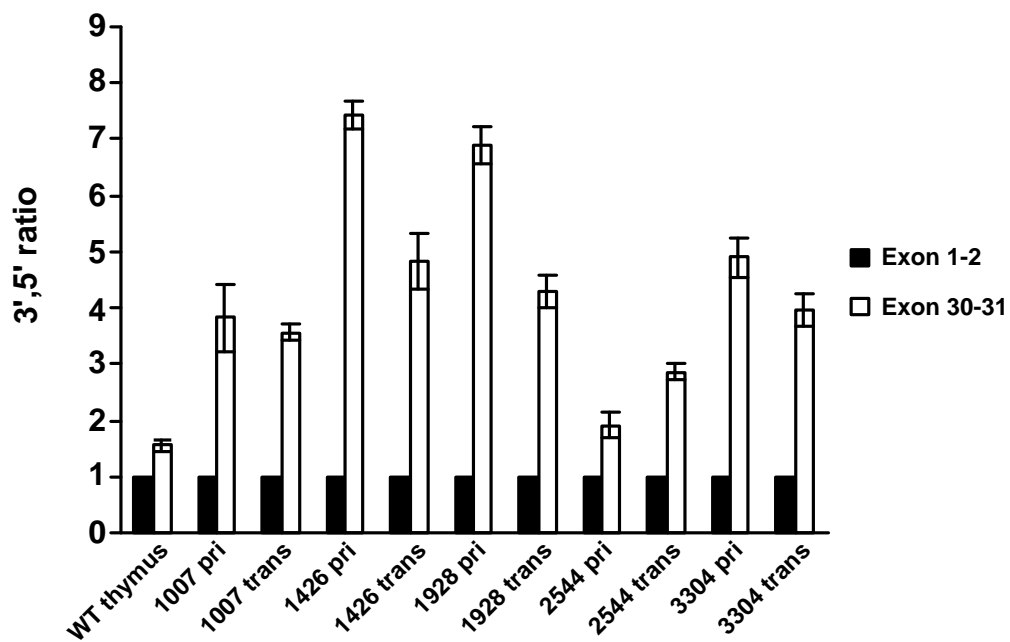

Supplement: supp_blood-2010-08-300343_Document1.pdf [file supp_blood-2010-08-300343_Document1.pdf]
